# Supplementary material
Source: PubMed Central journal article supplement (PMC5134412)
Supplement: TJP-594-6817-s003.pdf [file TJP-594-6817-s003.pdf]

## Core Domains Example: Simulation Output (plotted in Figure 7)

Figure 7 (reproduced in Figure S3-1) contained five traces. In order to obtain these traces, simulate the model found in 'ACoreDomainsExample.cellml' for 100 seconds.

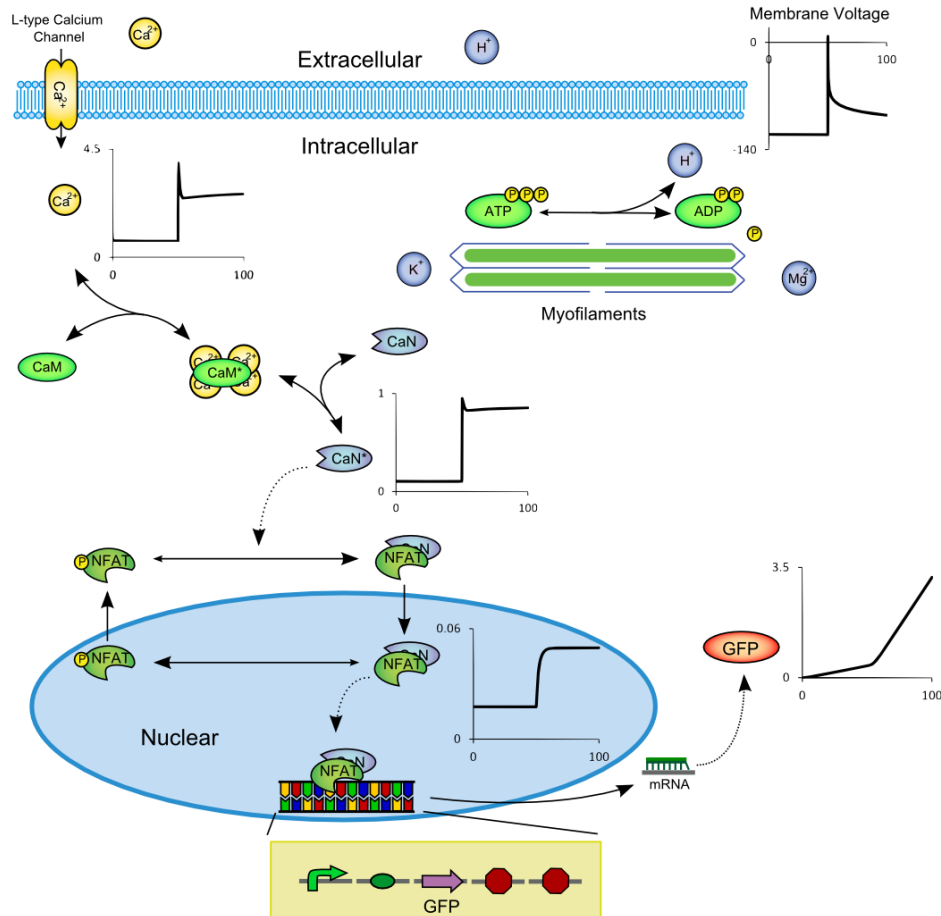

**Figure S3-1: Core Domains Example Schema and Output (Reproduced from Figure 7)**

The meaning and units of the y-axis for each trace (in order from top to bottom and left to right) is given in Table S2-1 below. The name of the CellML variable used in the plot is also given.

| Meaning                                     | Units         | CellML variable                                          |
|---------------------------------------------|---------------|----------------------------------------------------------|
| Membrane Voltage                            | Milli-Volt    | ICaL_to_Cai:membraneV:V                                  |
| Concentration of free intracellular calcium | Micro-molar   | ICaL_to_Cai:Ca:concentration                             |
| Proportion of activated calcineurin         | Dimensionless | CaN_to_DNAReady_NFAT: Calcineurin_Activation:act_N       |
| Concentration of GFP                        | Nano-molar    | ExampleDevice:GFP:concentration                          |
| Concentration of DNA-ready NFAT             | Micro-molar   | CaN_to_DNAReady_NFAT: NFAT_Cycling:NFATN_n:concentration |

**Table S2-1 Trace Information for Figure S3-1.**

**NB:** In OpenCOR, at the time of writing, it is very important to set the 'Point interval' and 'Maximum step' settings to  $\leq 0.1$  s, otherwise it may miss the stimulation current which has a very short duration. These settings are shown in the Figure S3-2.

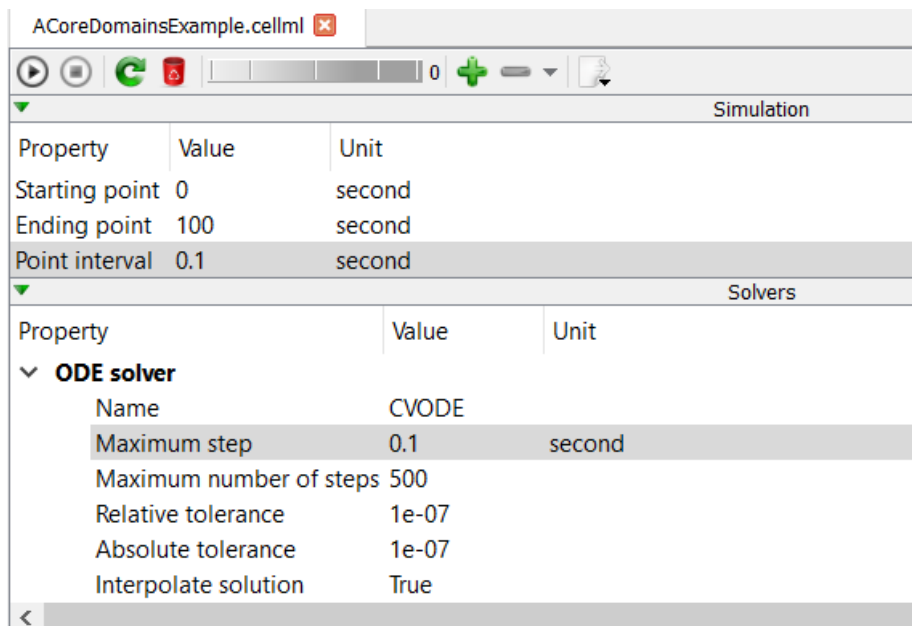

**Figure S3-2: Core Domains Example solver settings**
